# Supplementary material for: Open notes sounds great, but will a provider’s documentation change? An exploratory study of the effect of open notes on oncology documentation
Source: PubMed Central journal article supplement (PMC8518311; doi:10.1093/jamiaopen/ooab051), 2021-08-17
Supplement: ooab051_supplementary_data.pdf [file ooab051_supplementary_data.pdf]

**Appendix:**

I, \_\_\_\_\_, attest that the medical record entry for \_\_\_\_\_ accurately reflects the documentation I made when I assessed, diagnosed, treated, and/or communicated about the above named patient. I also attest that this information is true, accurate, and complete to the best of my knowledge and I understand that any falsification, omission, or concealment of material fact may subject me to administrative, civil, or criminal liability.
